# Supplementary material for: Downregulation of microRNA-199b predicts unfavorable prognosis and emerges as a novel therapeutic target which contributes to PP2A inhibition in metastatic colorectal cancer
Source: PubMed Central journal article supplement (PMC5522310; doi:10.18632/oncotarget.11174), 2016-08-10
Supplement: oncotarget-08-40169-s001.pdf [file oncotarget-08-40169-s001.pdf]

## Downregulation of microRNA-199b predicts unfavorable prognosis and emerges as a novel therapeutic target which contributes to PP2A inhibition in metastatic colorectal cancer

### Supplementary Materials

**Supplementary Table S1: Quantification of the expression levels of hsa-mir-199b by real-time PCR in 5 CRC cell lines**

| Cell line | SET OE | Mir-199b ( $-\Delta\Delta C_T$ ) |
|-----------|--------|----------------------------------|
| SW480     | yes    | -4,89                            |
| WiDr      | yes    | No expression                    |
| DLD-1     | yes    | No expression                    |
| HT-29     | yes    | -4,30                            |
| SW620     | yes    | -0,25                            |

OE: Overexpression.

$\Delta\Delta C_T = (C_{T,miR-199b} - C_{T,U6B})_{Cell Line} - (C_{T,Target Gene} - C_{T,U6B})_{Normal Controls}$ . The mean mir-199b expression from a set of 8 normal colonic mucosa samples was used as normal control in this experiment.

**Supplementary Table S2: Clinical and molecular characteristics of a series of 97 patients with metastatic CRC**

|                                      |  | No. (%) |        |
|--------------------------------------|--|---------|--------|
| <b>Sex</b>                           |  |         |        |
| Male                                 |  | 67      | (69.1) |
| Female                               |  | 30      | (30.9) |
| <b>Age</b>                           |  |         |        |
| < 70                                 |  | 44      | (47.3) |
| ≥ 70                                 |  | 49      | (52.7) |
| No data                              |  | 4       |        |
| <b>ECOG</b>                          |  |         |        |
| 0–2                                  |  | 75      | (81.5) |
| 3–4                                  |  | 17      | (18.5) |
| No data                              |  | 5       |        |
| <b>MSI</b>                           |  |         |        |
| No                                   |  | 89      | (93.7) |
| Yes                                  |  | 6       | (6.3)  |
| No data                              |  | 2       |        |
| <b>KRAS mutations</b>                |  |         |        |
| No                                   |  | 58      | (59.8) |
| Yes                                  |  | 39      | (40.2) |
| <b>Site of primary tumor</b>         |  |         |        |
| Colon                                |  | 72      | (74.2) |
| Rectum                               |  | 25      | (25.8) |
| <b>Synchronous metastasis</b>        |  |         |        |
| No                                   |  | 39      | (40.2) |
| Yes                                  |  | 58      | (59.8) |
| <b>Number of metastatic sites</b>    |  |         |        |
| 1–2                                  |  | 89      | (91.8) |
| > 2                                  |  | 8       | (8.2)  |
| <b>Liver metastasis</b>              |  |         |        |
| No                                   |  | 33      | (34)   |
| Yes                                  |  | 64      | (66)   |
| <b>Lung metastasis</b>               |  |         |        |
| No                                   |  | 68      | (70.1) |
| Yes                                  |  | 29      | (29.9) |
| <b>Lymph metastasis*</b>             |  |         |        |
| No                                   |  | 68      | (70.1) |
| Yes                                  |  | 29      | (29.9) |
| <b>Peritoneal metastasis</b>         |  |         |        |
| No                                   |  | 78      | (80.4) |
| Yes                                  |  | 19      | (19.6) |
| <b>Prior adjuvant chemotherapy**</b> |  |         |        |
| No                                   |  | 19      | (48.7) |
| Yes                                  |  | 20      | (51.3) |
| <b>Treatment 1st line metastatic</b> |  |         |        |
| Oxaliplatin                          |  | 39      | (41.5) |
| Irinotecan                           |  | 13      | (13.8) |
| 5-FU                                 |  | 9       | (9.6)  |
| None                                 |  | 33      | (35.1) |
| No data                              |  | 3       |        |

\*Non-regional lymph node involvement; \*\*Cases with metachronous metastasis only.

**Supplementary Table S3: Predictive value of response to treatment by miR-199b deregulation in those patients who received oxaliplatin-based chemotherapy**

|              | Response |                    |                 | <i>p</i>     |
|--------------|----------|--------------------|-----------------|--------------|
|              | Total    | No progression (%) | Progression (%) |              |
| Low miR-199b | 39       | 14                 | 25              | <b>0.018</b> |
| No           | 31       | 14 (100)           | 17 (68)         |              |
| Yes          | 8        | 0 (0)              | 8 (32)          |              |

The Fisher exact test was applied to calculate the *p*-value.

**Supplementary Table S4: Univariate and multivariate Cox analyses in the cohort of 97 patients with metastatic CRC**

|                            | Univariate PFS analysis |       |       |              | Multivariate PFS Cox analysis |       |       |              |
|----------------------------|-------------------------|-------|-------|--------------|-------------------------------|-------|-------|--------------|
|                            | 95% CI                  |       |       | Significance | 95% CI                        |       |       | Significance |
|                            | HR                      | Lower | Upper |              | HR                            | Lower | Upper |              |
| Age                        |                         |       |       | 0.102        |                               |       |       | –            |
| < 70                       | 1.00                    |       |       |              |                               |       |       |              |
| ≥ 70                       | 1.79                    | 0.89  | 3.62  |              | –                             |       | –     |              |
| Gender                     |                         |       |       | 0.352        |                               |       |       | –            |
| Male                       | 1.00                    |       |       |              |                               |       |       |              |
| Female                     | 0.71                    | 0.34  | 1.45  |              | –                             |       | –     |              |
| Synchronous                |                         |       |       | 0.480        |                               |       |       | –            |
| No                         | 1.00                    |       |       |              |                               |       |       |              |
| Yes                        | 1.32                    | 0.61  | 2.86  |              | –                             |       | –     |              |
| ECOG                       |                         |       |       | <b>0.008</b> |                               |       |       | <b>0.040</b> |
| 0–2                        | 1.00                    |       |       |              | 1.00                          |       |       |              |
| 3–4                        | 1.72                    | 1.15  | 2.57  |              | 1.54                          | 1.01  | 2.34  |              |
| Number of metastatic sites |                         |       |       | 0.225        |                               |       |       | –            |
| 1–2                        | 1.00                    |       |       |              |                               |       |       |              |
| > 2                        | 1.36                    | 0.82  | 2.26  |              | –                             |       | –     |              |
| MiR-199b downregulation    |                         |       |       | <b>0.005</b> |                               |       |       | <b>0.037</b> |
| No                         | 1.00                    |       |       |              | 1.00                          |       |       |              |
| Yes                        | 2.94                    | 1.38  | 6.27  |              | 2.32                          | 1.05  | 5.13  |              |

### Luciferase assay

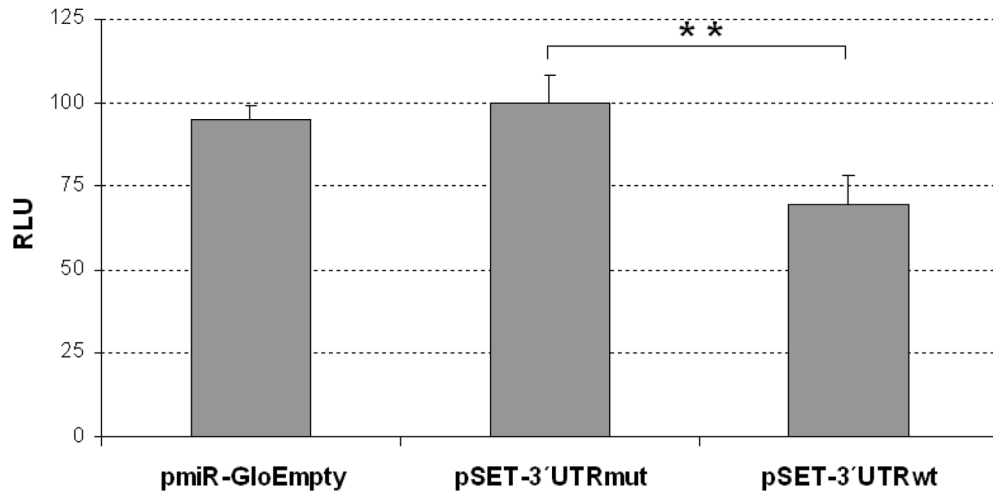

**Supplementary Figure S1: Luciferase assay showing changes in Firefly luciferase activity in SW480 cells ectopically expressing miR-199b and transfected with pmiR-Glo empty (negative control), or a pmiR-Glo vector with the 3'UTR region of SET that includes the miR-199b seed region (pSET-3'UTRwt). Transfection with the 3'UTR region of SET including a mutated seed region for miR-199b (pSET-3'UTRmut) was used as reference control. Results were normalized to Renilla luciferase activity and represented as relative luminescence units (RLU). Data represented are mean of three independent experiments  $\pm$  SD.  $**P < 0.01$ .**

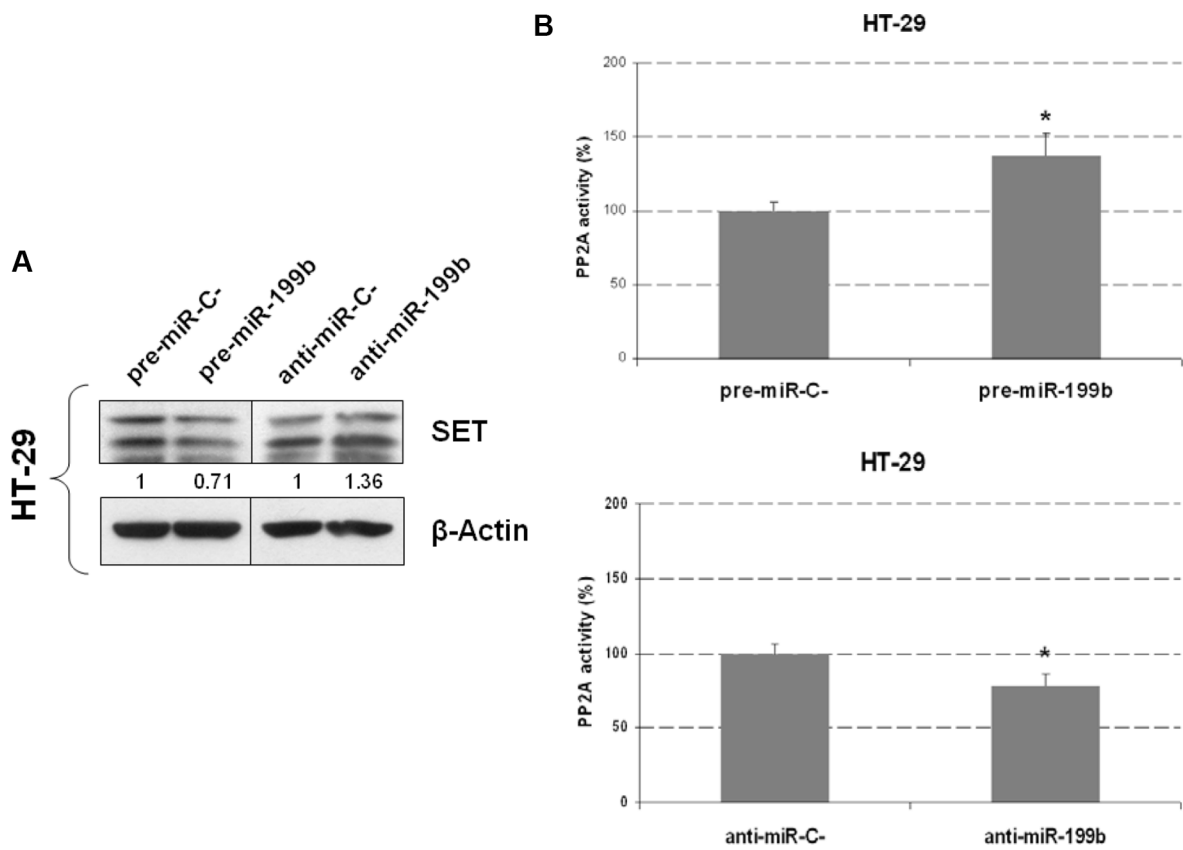

Supplementary Figure S2: (A) Western blot analysis showing SET expression in HT-29 cells transfected with pre- or anti-miR-199b; (B) PP2A assay showing changes in PP2A activity after transfection with pre- or anti-miR-199b.



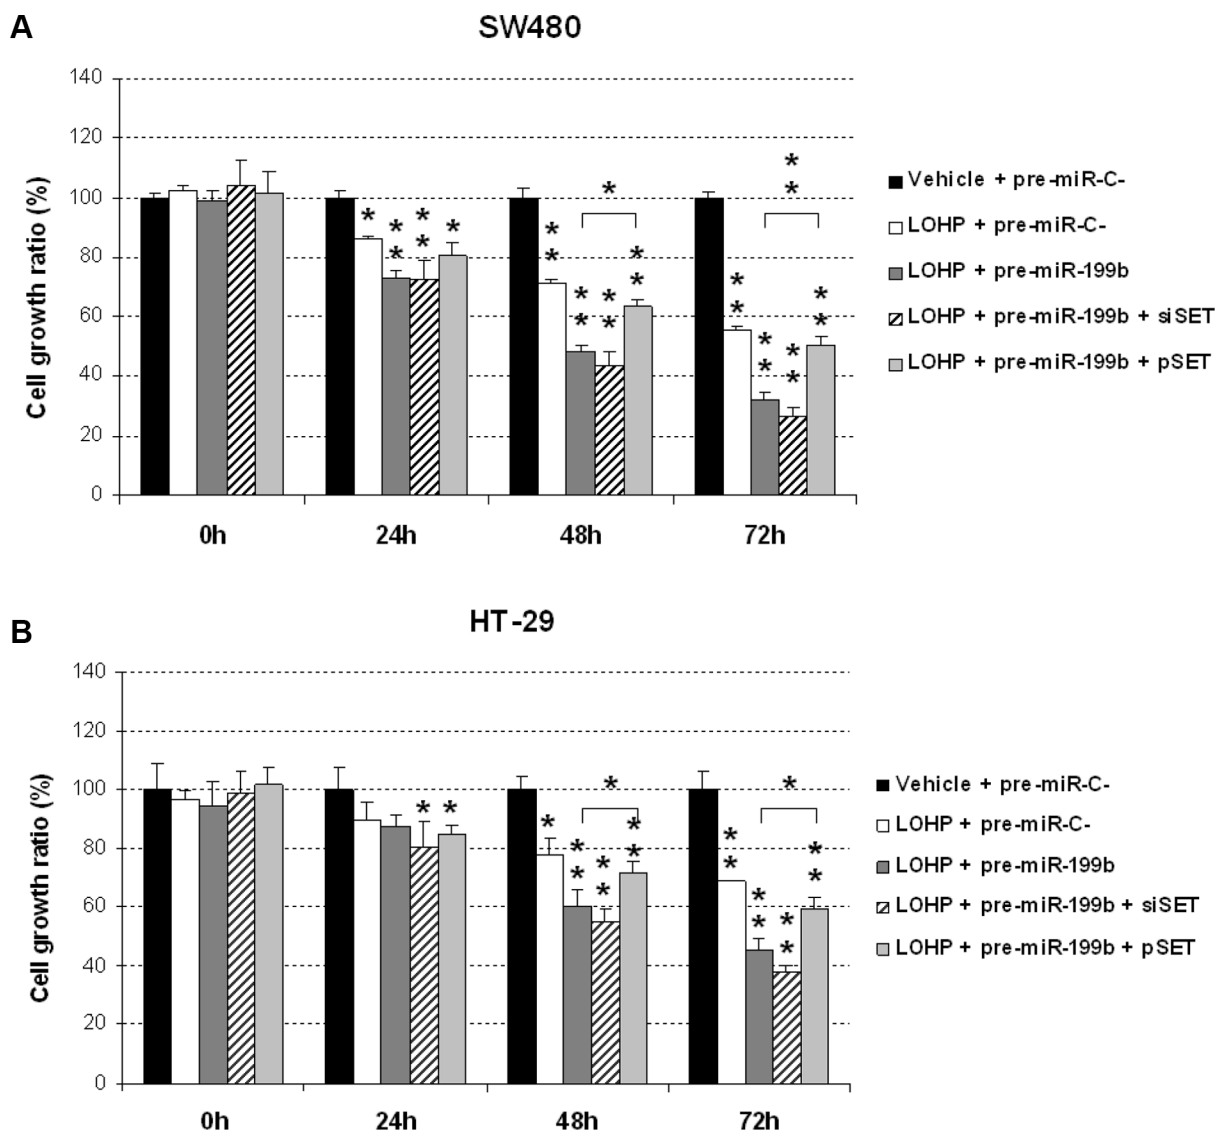

Supplementary Figure S5: MTS assay showing effects of SET modulation in miR-199b-dependent oxaliplatin re-sensitization in SW480 (A) and HT-29 cells (B); \* $P < 0.05$ ; \*\* $P < 0.01$

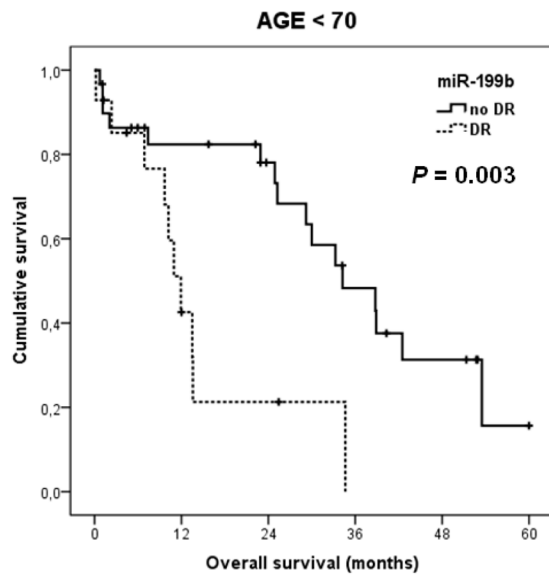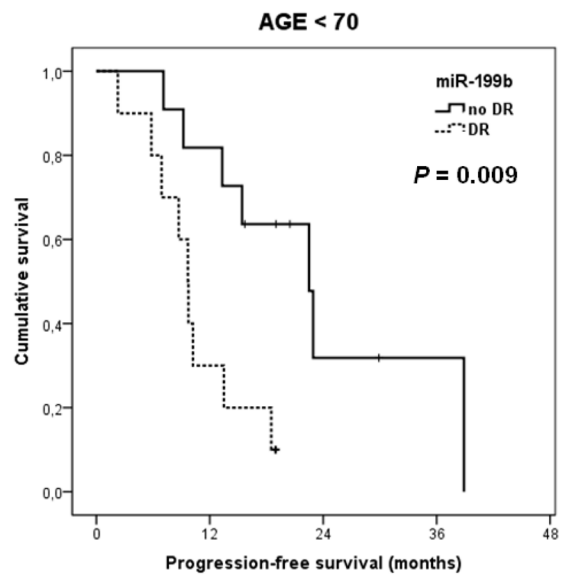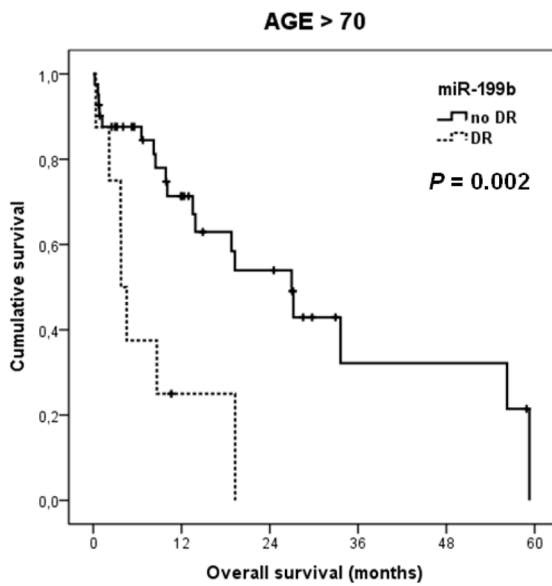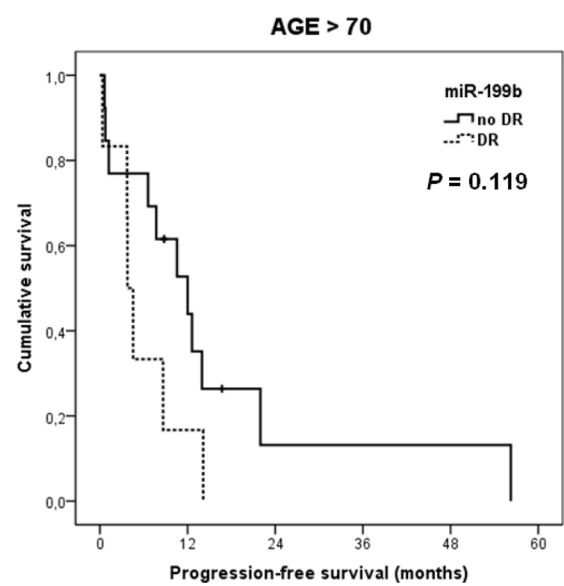

**Supplementary Figure S6: Kaplan-Meier analyses of overall and progression-free survival and in the subgroups of patients younger ( $N = 44$ ) and older than 70 years ( $N = 49$ ).**



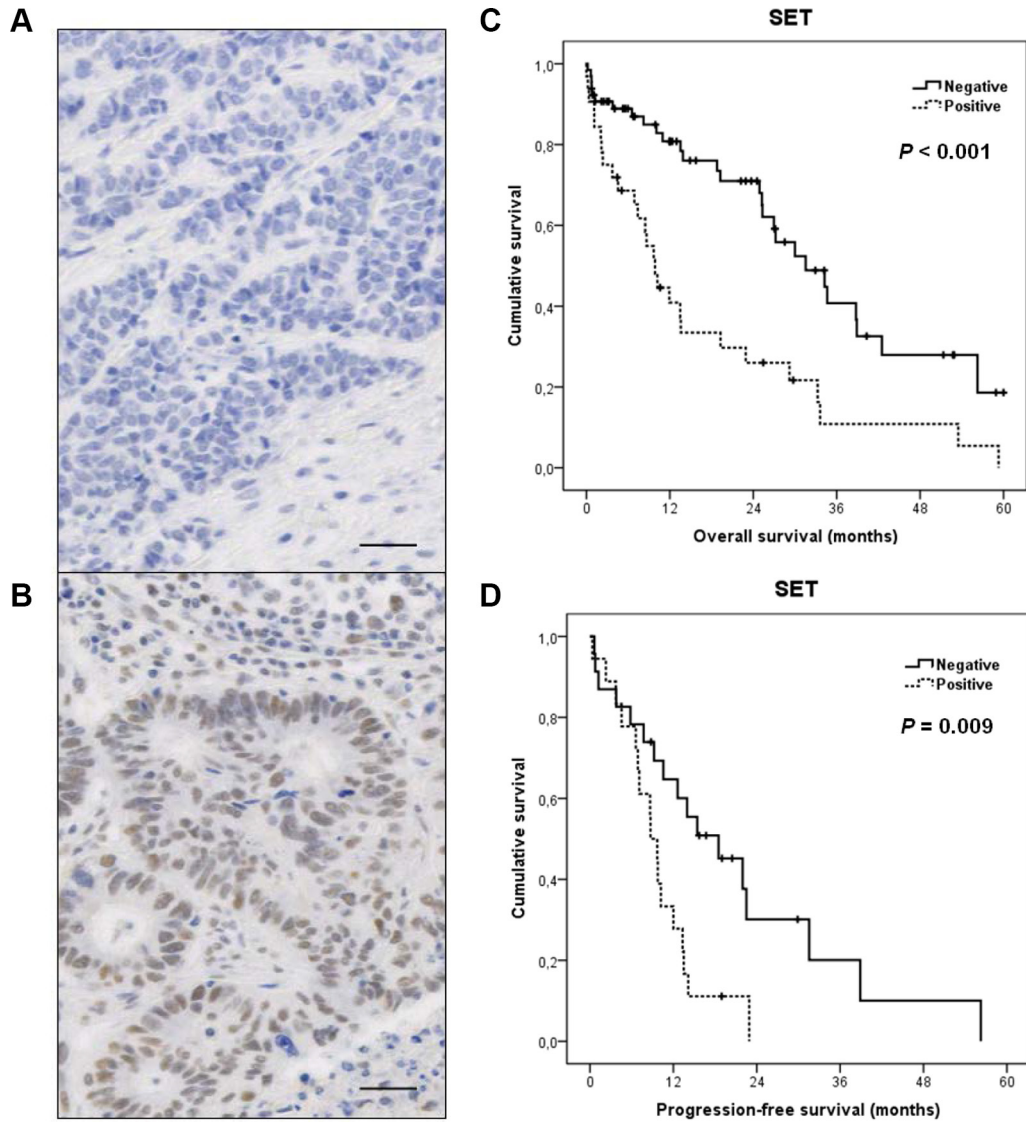

**Supplementary Figure S7: Immunohistochemical detection of SET expression in patients with metastatic colorectal cancer.** SET negative (A) and positive (B) staining. The line in A and B shows 25  $\mu$ m. Magnification x400. Kaplan-Meier analyses for SET in a cohort of 97 patients with metastatic CRC: (C) Overall survival; (D) Progression-free survival.

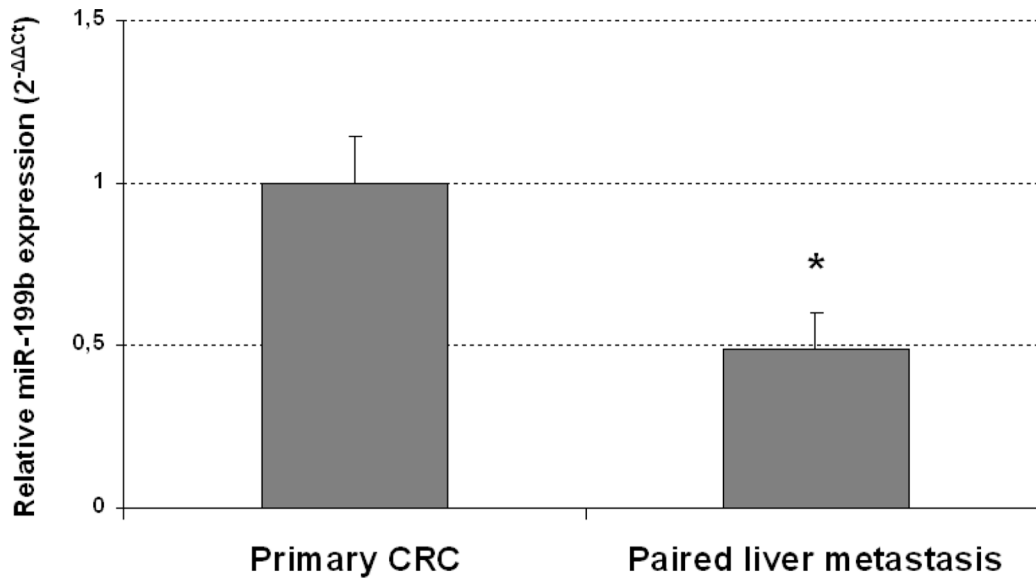

**Supplementary Figure S8: Relative miR-199b expression in 10 CRC primary tumors compared with paired liver metastases.** A related-samples Wilcoxon signed-ranked test was performed to assess statistical differences. \* $P < 0.05$ .

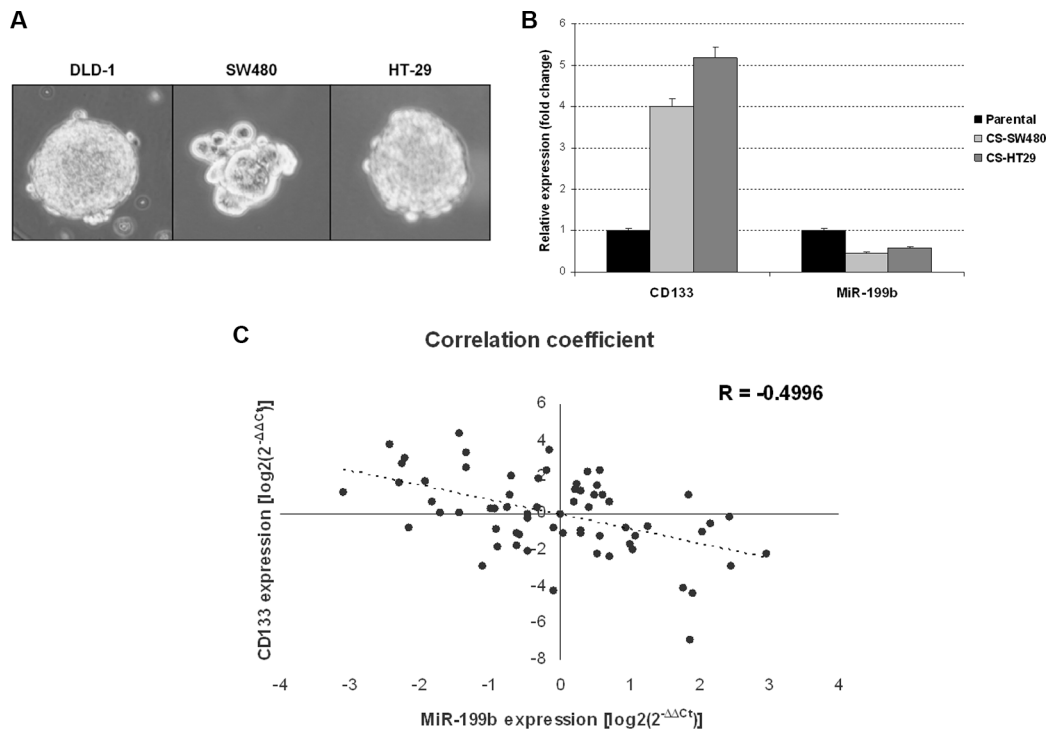

**Supplementary Figure S9: (A)** Optical microscope images showing DLD-1, SW480 and HT-29-derived colonospheres; **(B)** Quantification of miR-199b and CD133 expression in parental and colonosphere (CS)-derived SW480 and HT-29 cells. We used TaqMan Gene Expression Assays specific for *CD133* (Hs01009259\_m1) and GAPDH as internal control; **(C)** Scatter plot showing the correlation between miR-199b and *CD133* expression in 64 metastatic CRC patients.
